# Supplementary material for: Cisplatin binding to β-lactoglobulin: a structural study
Source: Royal Society of Chemistry journal article supplement (doi:10.1039/d0dt02582h), 2020-01-01
Supplement: d0dt02582h2.pdf [file d0dt02582h2.pdf]

## Supporting information

phosphate buffer pH. 6.9 (B), in the presence of CDDP in a protein to molar ratio 1:5 as a function of time.

30

### Cisplatin binding to $\beta$ -Lactoglobulin: a structural study

5 Nicole Balasco,<sup>a</sup> Giarita Ferraro,<sup>b</sup> Domenico Loreto,<sup>c</sup> Ilaria Iacobucci,<sup>c</sup> Maria Monti,<sup>c</sup> and Antonello Merlino<sup>c,\*</sup>

10 <sup>a</sup>Institute of Biostructures and Bioimaging, CNR, Via Mezzocannone 16, 80134 Napoli, Italy

<sup>b</sup>Department of Chemistry, University of Florence, Via della Lastruccia, Sesto Fiorentino (FI), Italy.

15 <sup>c</sup>Department of Chemical Sciences, University of Naples Federico II, Complesso Universitario di Monte Sant'Angelo, Via Cintia, I-80126, Napoli, Italy. Fax: +39081674090; Tel: +39081674276; E-mail: antonello.merlino@unina.it

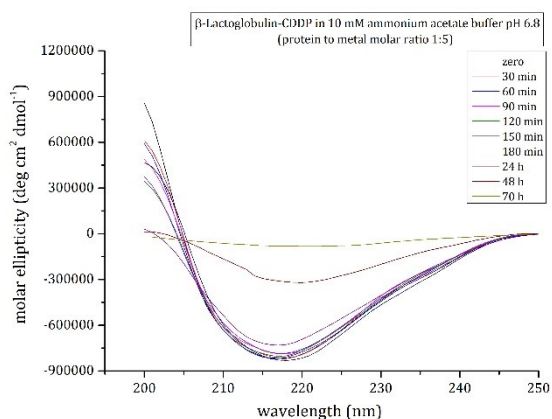

20 A

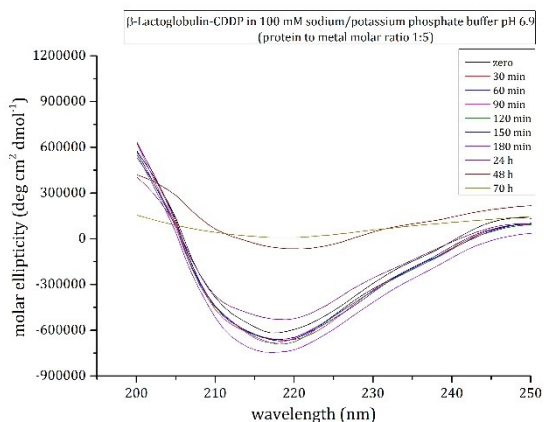

B

25 **Figure S1** CD spectra of  $\beta$ -Lactoglobulin in 10 mM ammonium acetate buffer pH 6.8 (A) and in 100 mM sodium/potassium
